# Supplementary material
Source: PubMed Central journal article supplement (PMC4561576)
Supplement: NIHMS699412-supplement.pdf [file NIHMS699412-supplement.pdf]

## **NDRG1 attenuates epithelial-mesenchymal transition of nasopharyngeal cancer cells via blocking Smad2 signaling**

Zhi-yan Hu<sup>1,2\*</sup>, Wei-Bing Xie<sup>3\*</sup>, Fang Yang<sup>1,2</sup>, Li-Wei Xiao<sup>1,2</sup>, Xiao-Yan Wang<sup>1,2</sup>, Shi-You Chen<sup>4</sup>, Zu-Guo Li<sup>1,2"</sup>.

<sup>1</sup>Department of Pathology, Nanfang Hospital, Southern Medical University, Guangzhou 510515, China; <sup>2</sup>Department of Pathology, School of Basic Medical Sciences, Southern Medical University, Guangzhou 510515, China; <sup>3</sup>Department of Forensic science, School of Basic Medical Sciences, Southern Medical University, Guangzhou 510515, China; <sup>4</sup>Department of Physiology & Pharmacology, University of Georgia, Athens, GA

### **Supplemental Materials**

#### **Supplemental Table:**

**Table S1. The differentially expressed proteins identified by MALDI-TOF-TOF spectrometry between NPC 5-8F and 5-8F-LN cell lines.**

| <b>MSDB ID</b> | <b>Protein full name</b>                                   | <b>5-8F/5-8F-LN</b> |
|----------------|------------------------------------------------------------|---------------------|
| LAMIN          | Prelamin-A/C                                               | 2.01898             |
| K2C7           | Keratin, type II cytoskeletal 7                            | 1.8887              |
| NDRG1          | N-myc downstream-regulated gene 1 protein                  | 1.50555             |
| EFTU           | Elongation factor Tu, mitochondrial                        | 1.64925             |
| FAS            | Tumor necrosis factor receptor superfamily member 6        | 1.536               |
| SPB4           | Serpin B4                                                  | 2.83408             |
| ACADS          | Short-chain specific acyl-CoA dehydrogenase, mitochondrial | 1.52603             |
| ACTA           | Alpha-actin-2                                              | 2.11457             |
| IPYR           | Inorganic pyrophosphatase                                  | 1.83611             |
| CTSD           | Cathepsin D                                                | 1.50259             |
| GDIR1          | Rho GDP-dissociation inhibitor 1                           | 2.09702             |

## Supplemental Figure 1

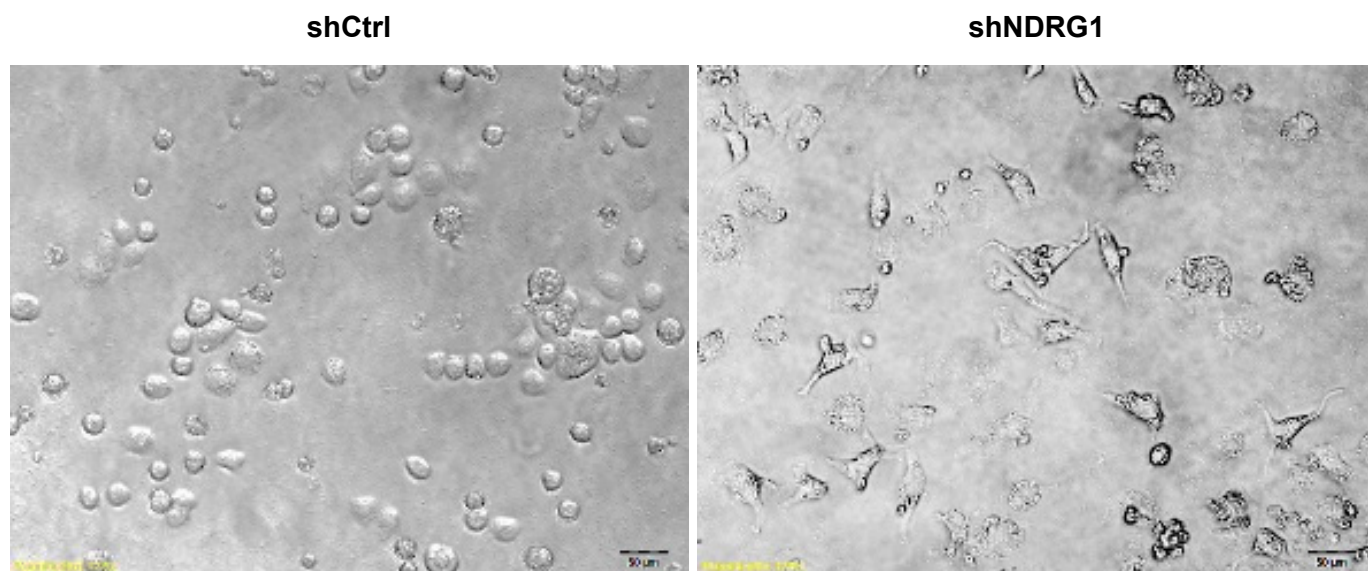

**Figure S1: Knockdown of NDRG1 by shRNA in 5-8F cells caused a morphological alteration that resembles an EMT.**

## Supplemental Figure 2

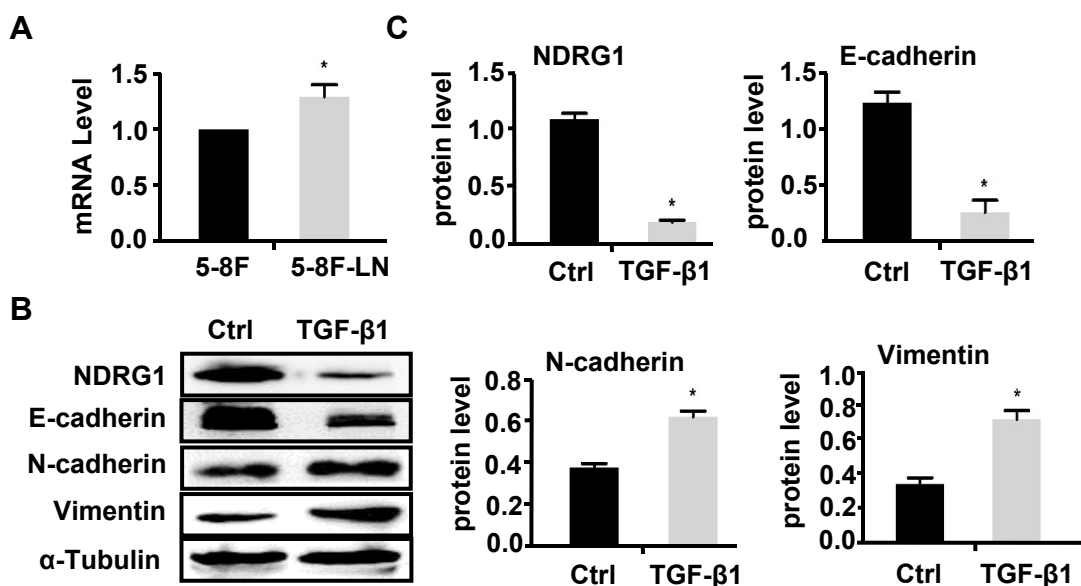

**Figure S2. TGF- $\beta$ 1 appeared to be involved in the EMT of 5-8F cells.** (A) TGF- $\beta$ 1 mRNA expression was increased in 5-8F-LN compared to 5-8F cells as detected by quantitative RT-PCR. \* $P < 0.05$  compared to 5-8F cells,  $n = 3$ . (B) TGF- $\beta$ 1 blocked NDRG1 expression while inducing EMT of 5-8F cells as shown by downregulation of E-cadherin and upregulation of N-cadherin and Vimentin. 5-8F cells were treated with TGF- $\beta$ 1 (5ng/ml) for 48 hours. Western blotting was performed to detect the expression of indicated proteins. (C) Quantification of protein levels shown in B by normalized to  $\alpha$ -Tubulin. \* $P < 0.01$  compared to 5-8F cells treated with vehicle (Ctrl),  $n = 3$ .

### Supplemental Figure 3

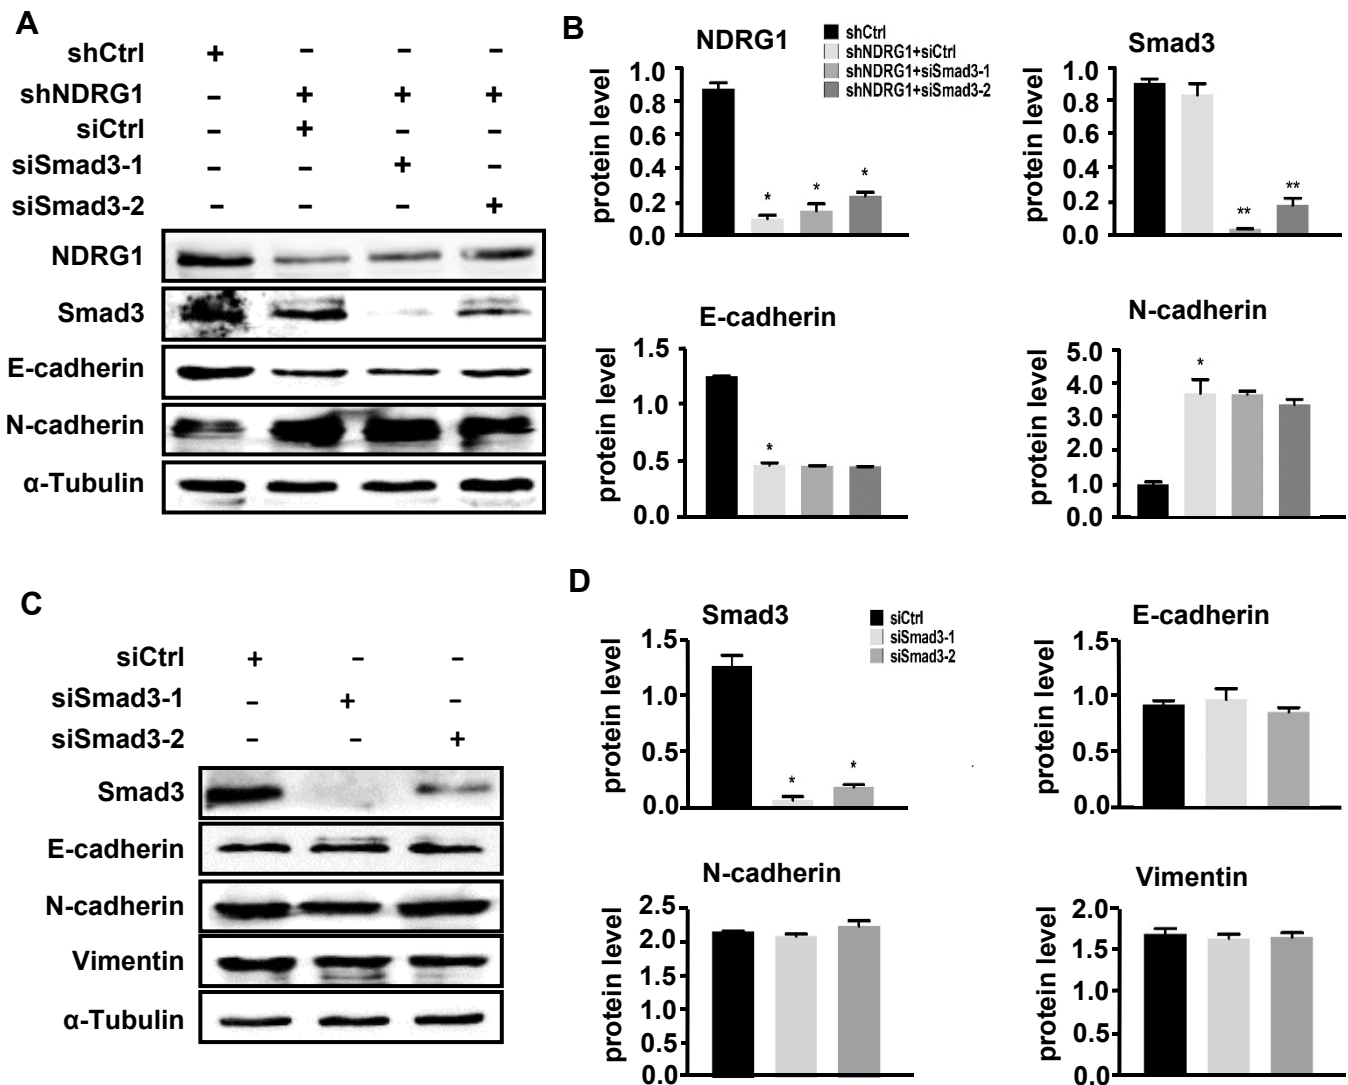

**Figure S3: Smad3 signaling was not essential for NDRG1 knockdown-induced EMT of NPC 5-8F cells.** (A) Knockdown of Smad3 did not alter E-Cadherin and N-cadherin expression in NDRG1-deficient 5-8F cells. (B) Quantification of protein levels shown in A by normalized to  $\alpha$ -Tubulin. \* $P < 0.01$  compared to NDRG1 control shRNA (shCtrl)-treated groups; \*\* $P < 0.001$  compared to Smad3 control siRNA (siCtrl)-treated groups for each individual protein,  $n = 3$ . (C) Knockdown of Smad3 did not alter the expression of E-Cadherin, N-cadherin, and Vimentin in 5-8F-LN cells. (D) Quantification of protein levels shown in C by normalized to  $\alpha$ -Tubulin. \* $P < 0.001$  compared to Smad3 control siRNA (siCtrl)-treated groups for Smad3 protein,  $n = 3$ .
